# Supplementary material for: How do stakeholders experience the adoption of electronic prescribing systems in hospitals? A systematic review and thematic synthesis of qualitative studies
Source: PubMed Central journal article supplement (PMC6934241; doi:10.1136/bmjqs-2018-009082), 2019-07-29
Supplement: bmjqs-2018-009082supp001.pdf [file bmjqs-2018-009082supp001.pdf]

**Supplementary Appendix 1: Example search strategy for Ovid MEDLINE(R)**

- 1 Electronic Prescribing/
- 2 ("electronic prescribing" or e-prescribing or eprescribing).ti,ab.
- 3 Medical Order Entry Systems/ or Medication Systems, Hospital/ or Pharmacy service, Hospital/
- 4 ((medica\$ or electronic or prescri\$) adj3 system\$1).ti,ab.
- 5 (computeri?ed adj2 ("order entry" or "order management")).ti,ab.
- 6 (CPOE or EP or EPMA or HEPMA or CDS or CDSS or eRx).ti,ab.
- 7 clinical decision support.mp. or Decision Support Systems, Clinical/
- 8 1 or 2 or 3 or 4 or 5 or 6 or 7
- 9 (perception\$1 or experience\$1 or perspective\$1 or insight\$1 or view\$1 or opinion\$1 or thought\$1 or expectation\$1 or belie\$ or anticipation\$1 or attitude\$1 or prospect\$1 or presumption\$1 or observation\$1 or lesson\$1 or interaction\$1).ti,ab.
- 10 8 and 9
- 11 limit 10 to "qualitative (maximizes specificity)"
- 12 qualitative research.mp. or exp Qualitative Research/
- 13 focus group\$1.mp. or exp Focus Groups/
- 14 nursing methodology research.mp. or exp Nursing Methodology Research/
- 15 (qualitative or "grounded theory" or ethnogra\$ or ethnolog\$ or phenomenogra\$ or phenomenolog\$ or hermeneutic\$ or "focus group\$1" or "field study" or fieldwork or "field work" or narrat\$ or "lived experience\$1" or "life experience\$1" or "key informant\$1" or "mixed method\$" or "multi-method\$").ti,ab.
- 16 (("semi-structured" or semistructured or unstructured or informal or "in-depth" or indepth or "face-to-face" or structured or guide\$) adj3 (interview\$1 or discussion\$1 or questionnaire\$1)).ti,ab.
- 17 12 or 13 or 14 or 15 or 16
- 18 10 and 17
- 19 11 or 18
