# Supplementary material for: How do stakeholders experience the adoption of electronic prescribing systems in hospitals? A systematic review and thematic synthesis of qualitative studies
Source: PubMed Central journal article supplement (PMC6934241; doi:10.1136/bmjqs-2018-009082), 2019-07-29
Supplement: bmjqs-2018-009082supp002.pdf [file bmjqs-2018-009082supp002.pdf]

Supplementary Table 1. Quality appraisal form items

| Approach and design |                                                                                                                                                                                                                                                                                                                                                                                                      |     |           |    |         |
|---------------------|------------------------------------------------------------------------------------------------------------------------------------------------------------------------------------------------------------------------------------------------------------------------------------------------------------------------------------------------------------------------------------------------------|-----|-----------|----|---------|
| 1                   | <p><b>Was the research problem and/or research question clearly reported/defined?</b></p> <ul style="list-style-type: none"> <li>• Description and significance of the problem/phenomenon studied?</li> <li>• Is there an explicit formulation of a research question or a statement drawing on a SPICE/PICO structure?</li> </ul>                                                                   | Yes | Partially | No | Unclear |
| 2                   | <p><b>Was there a clear statement of the aims and/or objectives of the research?</b></p> <ul style="list-style-type: none"> <li>• Did the researchers explicitly state the specific research objectives?</li> </ul>                                                                                                                                                                                  | Yes | Partially | No | Unclear |
| 3                   | <p><b>Was a qualitative methodology appropriate?</b></p> <ul style="list-style-type: none"> <li>• Did the study seek to interpret or illuminate the actions and/or subjective experiences of research participants?</li> </ul>                                                                                                                                                                       | Yes | Partially | No | Unclear |
| 4                   | <p><b>Was the research design appropriate to address the aims of the research?</b></p> <ul style="list-style-type: none"> <li>• Did the researcher justify the research design (e.g. have they discussed how they decided which method to use)?</li> </ul>                                                                                                                                           | Yes | Partially | No | Unclear |
| 5                   | <p><b>Was the sampling and recruitment strategy clearly defined and justified?</b></p> <ul style="list-style-type: none"> <li>• Did the researchers explain how and why the participants were selected?</li> <li>• Is there information about participant characteristics and if/why any participants chose not to take part?</li> <li>• Was saturation discussed/achieved?</li> </ul>               | Yes | Partially | No | Unclear |
| Data collection     |                                                                                                                                                                                                                                                                                                                                                                                                      |     |           |    |         |
| 6                   | <p><b>Was the method of data collection well described?</b></p> <ul style="list-style-type: none"> <li>• Was the setting justified?</li> <li>• Is it clear what methods used to collect data?</li> <li>• Were methods justified and made explicit?</li> <li>• Were methods modified during the study (how, why)?</li> </ul>                                                                          | Yes | Partially | No | Unclear |
| 7                   | <p><b>Were any techniques to enhance trustworthiness used?</b></p> <ul style="list-style-type: none"> <li>• e.g. member checking, audit trail, triangulation</li> </ul>                                                                                                                                                                                                                              | Yes | Partially | No | Unclear |
| 8                   | <p><b>Has the relationship between researchers and participants been adequately considered?</b></p> <ul style="list-style-type: none"> <li>• Did the researchers critically examine their own role, bias and influence?</li> <li>• Did the researchers consider the implications of any changes in the research design?</li> <li>• Were there any potential power relationships involved?</li> </ul> | Yes | Partially | No | Unclear |
| 9                   | <p><b>Have ethical issues been taken into consideration?</b></p>                                                                                                                                                                                                                                                                                                                                     | Yes | Partially | No | Unclear |

|                                   |                                                                                                                                                                                                                                                                                                                                                                                                                                                                                                                                                                                       |            |                  |           |                |
|-----------------------------------|---------------------------------------------------------------------------------------------------------------------------------------------------------------------------------------------------------------------------------------------------------------------------------------------------------------------------------------------------------------------------------------------------------------------------------------------------------------------------------------------------------------------------------------------------------------------------------------|------------|------------------|-----------|----------------|
|                                   | <ul style="list-style-type: none"> <li>• <i>How was the research explained to participants?</i></li> <li>• <i>Did the researchers discuss issues around informed consent or confidentiality or how they handled any effects of the study on participants during/after the study?</i></li> <li>• <i>Was ethical approval sought?</i></li> </ul>                                                                                                                                                                                                                                        |            |                  |           |                |
| <b>Data analysis and findings</b> |                                                                                                                                                                                                                                                                                                                                                                                                                                                                                                                                                                                       |            |                  |           |                |
| <b>10</b>                         | <b>Was the data analysis/interpretation process well described and justified?</b> <ul style="list-style-type: none"> <li>• <i>Is there a detailed description of the analysis process?</i></li> <li>• <i>Is the process by which inferences/categories/themes were derived from the data clearly explained?</i></li> </ul>                                                                                                                                                                                                                                                            | <b>Yes</b> | <b>Partially</b> | <b>No</b> | <b>Unclear</b> |
| <b>11</b>                         | <b>Was there a clear statement of findings?</b> <ul style="list-style-type: none"> <li>• <i>Is there adequate and balanced discussion of evidence both for and against the researchers' arguments?</i></li> <li>• <i>Are the findings discussed in relation to the original research question and/or study objectives?</i></li> </ul>                                                                                                                                                                                                                                                 | <b>Yes</b> | <b>Partially</b> | <b>No</b> | <b>Unclear</b> |
| <b>12</b>                         | <b>Are the analysis and findings credible?</b> <ul style="list-style-type: none"> <li>• <i>Are sufficient data presented to support the findings?</i></li> <li>• <i>To what extent contradictory data are taken into account?</i></li> <li>• <i>Did the researchers discuss the credibility of their findings?</i></li> <li>• <i>Are the explanations presented plausible and coherent?</i></li> <li>• <i>Were alternative explanations for the findings explored?</i></li> </ul>                                                                                                     | <b>Yes</b> | <b>Partially</b> | <b>No</b> | <b>Unclear</b> |
| <b>Other</b>                      |                                                                                                                                                                                                                                                                                                                                                                                                                                                                                                                                                                                       |            |                  |           |                |
| <b>13</b>                         | <b>Was any conflict of interest reported?</b>                                                                                                                                                                                                                                                                                                                                                                                                                                                                                                                                         | <b>Yes</b> |                  | <b>No</b> |                |
| <b>14</b>                         | <b>Open comments for discussion</b> <ul style="list-style-type: none"> <li>• <i>How valuable is the research overall?</i></li> <li>• <i>Did the researchers discuss the contribution the study makes to existing knowledge or understanding?</i></li> <li>• <i>Were the findings considered in relation to current practice or policy?</i></li> <li>• <i>Did the researchers identify any new areas where further research is necessary?</i></li> <li>• <i>Did the researchers discuss whether or how the findings might be transferred to other populations/settings?</i></li> </ul> |            |                  |           |                |
