# Supplementary material for: How do stakeholders experience the adoption of electronic prescribing systems in hospitals? A systematic review and thematic synthesis of qualitative studies
Source: PubMed Central journal article supplement (PMC6934241; doi:10.1136/bmjqs-2018-009082), 2019-07-29
Supplement: bmjqs-2018-009082supp003.pdf [file bmjqs-2018-009082supp003.pdf]

**Supplementary Table 2. Data extraction form items**

|    |                                                          |
|----|----------------------------------------------------------|
| 1  | Full article reference                                   |
| 2  | Study country                                            |
| 3  | Study year(s)                                            |
| 4  | Study setting                                            |
| 5  | System type                                              |
| 6  | Type of participants/user groups                         |
| 7  | Number of participants                                   |
| 8  | Sampling strategy                                        |
| 9  | Data collection methods                                  |
| 10 | Data analysis methods                                    |
| 11 | Theoretical framework                                    |
| 12 | Reflexivity                                              |
| 13 | Techniques to enhance trustworthiness                    |
| 14 | Study findings ('results' or 'findings' section in full) |
