# Supplementary material for: How do stakeholders experience the adoption of electronic prescribing systems in hospitals? A systematic review and thematic synthesis of qualitative studies
Source: PubMed Central journal article supplement (PMC6934241; doi:10.1136/bmjqs-2018-009082), 2019-07-29
Supplement: bmjqs-2018-009082supp004.pdf [file bmjqs-2018-009082supp004.pdf]

Supplementary Table 3: Key characteristics of the included studies

| Paper                       | Country       | Setting                                                                 | System type                                                                       | Participants/user groups                                                                                                          | Number of participants | Data collection method                                                                    | Theoretical framework                                                                                                                     | Data analysis method |
|-----------------------------|---------------|-------------------------------------------------------------------------|-----------------------------------------------------------------------------------|-----------------------------------------------------------------------------------------------------------------------------------|------------------------|-------------------------------------------------------------------------------------------|-------------------------------------------------------------------------------------------------------------------------------------------|----------------------|
| Aarts et al. (2004) [55]    | Netherlands   | Large academic medical center                                           | Computerised Provider/Physician Order Entry (CPOE)                                | Project leaders<br>Project coordinators<br>Clinicians<br>IT administrators<br>Pathology technicians<br>Medical record coordinator | 10                     | Semistructured interviews<br>Observations<br>Document analysis                            | Drawing on three theoretical aspects of science and technology studies (STS): sociotechnical approach; emergent change; success & failure | Content analysis     |
| Abraham et al. (2018) [95]  | United States | One academic medical centre                                             | CPOE + Clinical decision support (CDS)                                            | Physicians<br>Pharmacists<br>Nurses                                                                                               | 80                     | Semistructured interviews                                                                 | Data analysis was informed by a structured framework of CPOE-related medication errors (Schiff et al., 2015)                              | Thematic analysis    |
| Abramson et al. (2012) [18] | United States | Urban hospital-based adult internal medicine outpatient clinic          | Electronic health records (EHR)-based Electronic prescribing (ePrescribing) + CDS | Physicians                                                                                                                        | 16                     | Observations<br>Semi-structured interviews                                                |                                                                                                                                           | Grounded theory      |
| Abramson et al. (2016) [81] | United States | Urban hospital-based adult internal medicine outpatient clinic          | EHR-based ePrescribing + CDS                                                      | Physicians                                                                                                                        | 13                     | Semi-structured interviews                                                                |                                                                                                                                           | Grounded theory      |
| Ash et al. (1999) [24]      | United States | Two hospitals, with system in use for 10 years and 2 years respectively | CPOE                                                                              | Physicians<br>Administrators<br>Information technology staff<br>Pharmacists<br>Nurses                                             | Not reported           | Participant observation<br>Focus groups<br>Oral history interviews<br>Informal interviews |                                                                                                                                           | Grounded theory      |

| Paper                   | Country       | Setting                                                                                                             | System type | Participants/user groups                                                              | Number of participants | Data collection method                                                                    | Theoretical framework                                                                  | Data analysis method |
|-------------------------|---------------|---------------------------------------------------------------------------------------------------------------------|-------------|---------------------------------------------------------------------------------------|------------------------|-------------------------------------------------------------------------------------------|----------------------------------------------------------------------------------------|----------------------|
| Ash et al. (2000) [48]  | United States | Four hospitals across three organisations, with differences in teaching status, geography and length of system use. | CPOE        | Physicians<br>Administrators<br>Information technology staff<br>Pharmacists<br>Nurses | Not reported           | Participant observation<br>Focus groups<br>Oral history interviews<br>Informal interviews |                                                                                        | Grounded theory      |
| Ash et al. (2001a) [51] | United States | Four hospitals across three organisations, with differences in teaching status, geography and length of system use. | CPOE        | Physicians<br>Administrators<br>Information technology staff<br>Pharmacists<br>Nurses | Not reported           | Participant observation<br>Focus groups<br>Oral history interviews<br>Informal interviews |                                                                                        | Grounded theory      |
| Ash et al. (2001b) [57] | United States | Four hospitals across three organisations, with differences in teaching status, geography and length of system use. | CPOE        | Clinicians<br>IT professionals<br>Administrators                                      | 55                     | Participant observation<br>Focus groups<br>Oral history interviews<br>Informal interviews | Diffusion of innovations theory framework over the results of grounded theory analysis | Grounded theory      |
| Ash et al. (2003a) [43] | United States | Four hospitals across three organisations, with differences in teaching status, geography and length of system use. | CPOE        | Clinicians<br>IT professionals<br>Administrators                                      | 56                     | Participant observation<br>Focus groups<br>Oral history interviews<br>Informal interviews |                                                                                        | Grounded theory      |

| Paper                   | Country       | Setting                                                                                                             | System type | Participants/user groups                                                                                                                           | Number of participants | Data collection method                                                                                              | Theoretical framework | Data analysis method |
|-------------------------|---------------|---------------------------------------------------------------------------------------------------------------------|-------------|----------------------------------------------------------------------------------------------------------------------------------------------------|------------------------|---------------------------------------------------------------------------------------------------------------------|-----------------------|----------------------|
| Ash et al. (2003b) [42] | United States | Four hospitals across three organisations, with differences in teaching status, geography and length of system use. | CPOE        | Clinicians<br>IT professionals<br>Administrators                                                                                                   | 87                     | Participant observation<br>Focus groups<br>Oral history interviews<br>Informal interviews                           |                       | Grounded theory      |
| Ash et al. (2003c) [58] | United States | Four hospitals across three organisations, with differences in teaching status, geography and length of system use. | CPOE        | Clinicians<br>IT professionals<br>Administrators                                                                                                   | 156                    | Participant observation<br>Focus groups<br>Oral history interviews<br>Informal interviews                           |                       | Grounded theory      |
| Ash et al. (2005) [52]  | United States | Five hospitals across four organisations, with differences in teaching status, geography and length of system use.  | CPOE        | Clinicians<br>IT professionals<br>Administrators                                                                                                   | not reported           | Participant observation<br>Focus groups<br>Oral history interviews<br>Informal interviews                           |                       | Grounded theory      |
| Ash et al. (2012) [53]  | United States | Thirty-four community hospitals, with over 5 years experience with CPOE each                                        | CPOE + CDS  | Clinical application coordinators<br>Chief medical information officers<br>Chief information officers<br>Clinical analysts<br>Department directors | 34                     | Semistructured interview, conducted as a subset of questions in the context of a mixed-methods interview instrument |                       | Grounded theory      |

| Paper                      | Country        | Setting                                                               | System type                | Participants/user groups                                                                                                                                                                                                                          | Number of participants         | Data collection method                     | Theoretical framework                        | Data analysis method       |
|----------------------------|----------------|-----------------------------------------------------------------------|----------------------------|---------------------------------------------------------------------------------------------------------------------------------------------------------------------------------------------------------------------------------------------------|--------------------------------|--------------------------------------------|----------------------------------------------|----------------------------|
| Barber et al. (2007) [16]  | United Kingdom | Surgical ward in a teaching hospital                                  | ePrescribing + limited CDS | Nursing staff<br>Doctors<br>Pharmacists<br>Hospital management                                                                                                                                                                                    | 40                             | Interviews<br>Observations<br>Focus group  | Socio-technical evaluation framework         | Discourse analysis         |
| Baysari et al. (2011) [80] | Australia      | Teaching hospital                                                     | CPOE + CDS                 | Specialty teams (cardiology, clinical pharmacology, lung transplantation, colorectal surgery, gastroenterology, gerontology, hematology, infectious diseases, nephrology, neurology and palliative care).<br>Prescribers/doctors from these teams | 46                             | Observations<br>Semi-structured interviews |                                              | Thematic analysis          |
| Baysari et al. (2012) [73] | Australia      | Teaching hospital                                                     | CPOE + basic CDS           | Doctors                                                                                                                                                                                                                                           | 16                             | Semi-structured interviews                 |                                              | Thematic analysis          |
| Baysari et al. (2014) [78] | Australia      | Teaching hospital                                                     | CPOE + CDS                 | Doctors                                                                                                                                                                                                                                           | 74 (in qualitative components) | Observations<br>Semi-structured interviews |                                              | Thematic analysis          |
| Baysari et al. (2017) [92] | Australia      | Teaching hospital                                                     | CPOE + CDS                 | Doctors                                                                                                                                                                                                                                           | 11 (in qualitative component)  | Semi-structured interviews                 |                                              | General inductive approach |
| Baysari et al. (2018) [61] | Australia      | Acute pediatric tertiary hospital                                     | CPOE + CDS                 | Doctors<br>Nurses                                                                                                                                                                                                                                 | 114                            | Semi-structured interviews                 | Extended Technology Acceptance Model (e-TAM) | Thematic analysis          |
| Botta & Cutler (2014) [54] | United States  | 17 hospital systems, representing 144 individual acute-care hospitals | EHR-based CPOE + CDS       | Chief Information Officers<br>EHR development executives (vendors)                                                                                                                                                                                | 25                             | Semi-structured interviews                 |                                              | Thematic analysis          |

| Paper                       | Country        | Setting                                                                                                                                                              | System type        | Participants/user groups                                                                                                                       | Number of participants | Data collection method                                  | Theoretical framework                                                                                      | Data analysis method |
|-----------------------------|----------------|----------------------------------------------------------------------------------------------------------------------------------------------------------------------|--------------------|------------------------------------------------------------------------------------------------------------------------------------------------|------------------------|---------------------------------------------------------|------------------------------------------------------------------------------------------------------------|----------------------|
| Burgin et al. (2012) [98]   | United Kingdom | Large teaching hospital                                                                                                                                              | EHR + ePrescribing | Pharmacists of all levels of seniority                                                                                                         | 20                     | Semi-structured focus groups                            | Actor Network Theory (ANT) and Engestrom's concept of human activity system from Expansive Learning Theory | Thematic analysis    |
| Burgin et al. (2014) [97]   | United Kingdom | Large teaching hospital                                                                                                                                              | EHR + ePrescribing | Pharmacists of all levels of seniority                                                                                                         | 20                     | Semi-structured focus groups                            | Actor Network Theory (ANT) and Engestrom's concept of human activity system from Expansive Learning Theory | Thematic analysis    |
| Campbell et al. (2007) [90] | United States  | Five hospitals, representing different organizational types (e.g., tertiary teaching vs. private community) using either commercially or self developed CPOE systems | CPOE + CDS         | Hospital administrators<br>Physicians<br>Nurses<br>Pharmacists<br>Lab workers<br>Medical records specialists<br>Information technology leaders | 126                    | Observations<br>Semi-structured oral history interviews | Concept of overdependence on technology, drawing on Rogers' Diffusion of Innovations                       | Grounded theory      |
| Campbell et al. (2009) [85] | United States  | Five hospitals across three organisations (including 2 large academic general hospitals, 2 community hospitals and 1 acute care county teaching hospital)            | CPOE + CDS         | Hospital administrators<br>Physicians<br>Nurses<br>Pharmacists<br>Other clinical personnel<br>IT staff                                         | 126                    | Observations<br>Semi-structured oral history interviews |                                                                                                            | Grounded theory      |

| Paper                          | Country        | Setting                                                                                                                             | System type                                                             | Participants/user groups                                                                                                                   | Number of participants | Data collection method                                                                                                                          | Theoretical framework                                                            | Data analysis method |
|--------------------------------|----------------|-------------------------------------------------------------------------------------------------------------------------------------|-------------------------------------------------------------------------|--------------------------------------------------------------------------------------------------------------------------------------------|------------------------|-------------------------------------------------------------------------------------------------------------------------------------------------|----------------------------------------------------------------------------------|----------------------|
| Carpenter & Gorman (2001) [83] | United States  | Four hospitals, with differences in teaching status, geography and length of system use                                             | CPOE + CDS                                                              | Physicians<br>Administrators<br>Information technology staff                                                                               | 16                     | Observations<br>Interviews                                                                                                                      |                                                                                  | Grounded theory      |
| Chow et al. (2015) [106]       | Singapore      | Adult tertiary hospital                                                                                                             | Antibiotic CDS system                                                   | Junior physicians<br>Senior physicians                                                                                                     | 11                     | Focus groups                                                                                                                                    |                                                                                  | Framework approach   |
| Cornford et al. (2010) [46]    | United Kingdom | Thirteen hospitals, representing the implementation of 20 different systems                                                         | ePrescribing + CDS                                                      | Doctors<br>Nurses<br>Pharmacists<br>Systems developers<br>Managers                                                                         | 50                     | Interviews<br>Survey                                                                                                                            |                                                                                  | Thematic analysis    |
| Cresswell et al. (2013a) [44]  | United Kingdom | Multiple stakeholders representing 55 organisations - including acute (47), mental health (7) and community (1) based organisations | ePrescribing (+ CDS implemented or planned in 82% of represented sites) | Pharmacists<br>Managers<br>Consultants (medical)<br>Clinical Leads<br>Nurse Leads                                                          | 85                     | Questionnaire, including a qualitative component (subsets of semi-structured and open-ended questions)                                          |                                                                                  | Thematic analysis    |
| Cresswell et al. (2013b) [45]  | United Kingdom | Multiple stakeholders with experience in implementing ePrescribing systems in UK hospitals                                          | ePrescribing                                                            | Representatives from hospitals at various stages of implementation<br>System developers<br>Policy representatives<br>Patients<br>Academics | 17                     | One-day event including a series of sequential, multi-disciplinary round-table discussions with two parallel groups considering the same topics | Self-developed and refined theoretical framework drawing on Actor-Network Theory | Thematic analysis    |

| Paper                          | Country        | Setting                                                                                                                                  | System type  | Participants/user groups                                                                                                                                                                                                                                             | Number of participants | Data collection method                                          | Theoretical framework                                                            | Data analysis method |
|--------------------------------|----------------|------------------------------------------------------------------------------------------------------------------------------------------|--------------|----------------------------------------------------------------------------------------------------------------------------------------------------------------------------------------------------------------------------------------------------------------------|------------------------|-----------------------------------------------------------------|----------------------------------------------------------------------------------|----------------------|
| Cresswell et al. (2014) [9]    | United Kingdom | Two urban, acute care hospitals                                                                                                          | CPOE + CDS   | Pharmacists<br>Nurses<br>Doctors<br>Project managers<br>IT professionals                                                                                                                                                                                             | 43                     | Document analysis<br>Semi-structured interviews<br>Observations | Self-developed and refined theoretical framework drawing on Actor-Network Theory | Thematic analysis    |
| Cresswell et al. (2016a) [109] | United Kingdom | Multiple stakeholders with experience in implementing ePrescribing systems in UK hospitals                                               | ePrescribing | Pharmacists<br>Prescribing software company representatives<br>Academics<br>Policy representatives<br>Industry representatives<br>Consultants<br>Pharmaceutical company representative<br>Innovation centre representative<br>Patient                                | 21                     | Focus groups                                                    | Drawing on information infrastructure studies                                    | Thematic analysis    |
| Cresswell et al. (2016b) [62]  | United Kingdom | Multiple stakeholders involved in the implementation of hospital electronic prescribing and medicines administration systems in Scotland | ePrescribing | Pharmacists<br>System suppliers<br>Antimicrobial prescribing group members<br>Policy representatives<br>Analytic company representative<br>Academic nurse<br>Patient association member<br>Oncology consultant<br>Pain consultant<br>Prescribing support unit member | 21                     | Focus groups                                                    | Drawing on information infrastructure studies                                    | Thematic analysis    |

| Paper                         | Country        | Setting                                                        | System type                                         | Participants/user groups                                                                                                                                                                                                                                                                            | Number of participants | Data collection method                                                                                            | Theoretical framework                                                           | Data analysis method |
|-------------------------------|----------------|----------------------------------------------------------------|-----------------------------------------------------|-----------------------------------------------------------------------------------------------------------------------------------------------------------------------------------------------------------------------------------------------------------------------------------------------------|------------------------|-------------------------------------------------------------------------------------------------------------------|---------------------------------------------------------------------------------|----------------------|
| Cresswell et al. (2017a) [23] | United Kingdom | Six urban, acute care hospitals                                | ePrescribing + CDS                                  | Hospital decision makers<br>Implementation teams<br>Information technology staff<br>Clinicians<br>Allied health professionals<br>System suppliers                                                                                                                                                   | 195                    | Semi-structured interviews<br>Non-participant observations<br>Document analysis<br>Expert round-table discussions | Interpretation of findings drew on the concept of 'information infrastructures' | Thematic analysis    |
| Cresswell et al. (2017b) [22] | United Kingdom | Five acute care hospitals, at various stages of implementation | ePrescribing systems with differing functionalities | Managers (information technology and clinical implementation team members) involved in implementing ePrescribing<br>Users (including doctors, nurses, pharmacists, allied health professionals and pharmacy technicians varying in levels of seniority and experience with ePrescribing system use) | 173                    | Interviews<br>Non-participant observation<br>Document analysis                                                    | Interpretation of findings drew on the Theory of Workarounds                    | Thematic analysis    |
| Cresswell et al. (2017c) [59] | United Kingdom | Six hospitals                                                  | CPOE + CDS                                          | Clinical users (physicians, nurses, pharmacists, and other allied health professionals)<br>Support staff (technicians)<br>System vendors<br>Managers (implementation teams, information technology specialists) of varying levels of seniority                                                      | 197                    | Semi-structured interviews<br>Non-participant observations<br>Document analysis                                   |                                                                                 | Thematic analysis    |



| Paper                          | Country        | Setting                            | System type        | Participants/user groups                                                                                                                                                                                                                                                                                                          | Number of participants         | Data collection method                                                                                | Theoretical framework                                                                                                | Data analysis method                                                                               |
|--------------------------------|----------------|------------------------------------|--------------------|-----------------------------------------------------------------------------------------------------------------------------------------------------------------------------------------------------------------------------------------------------------------------------------------------------------------------------------|--------------------------------|-------------------------------------------------------------------------------------------------------|----------------------------------------------------------------------------------------------------------------------|----------------------------------------------------------------------------------------------------|
| Davidson & Chismar (2007) [47] | United States  | One urban, acute care hospital     | CPOE               | Physicians from different specialties (cardiology, general surgery, internal medicine, orthopedics, oncology)<br>Nurses and nurse administrators<br>Unit secretaries<br>Pharmacists<br>Laboratory supervisors<br>Respiratory therapists<br>Health-care analysts<br>Information Systems staff members<br>Chief Information Officer | 32                             | Semi-structured interviews                                                                            | Barley's (1990) model for the alignment of technology and social structure, and Scott's (2001) institutional theory. | Theoretically informed framework (Barley, 1990) drawing on the principle of the hermeneutic circle |
| Debono et al. (2017) [88]      | Australia      | Two large urban teaching hospitals | ePrescribing + CDS | Nurses                                                                                                                                                                                                                                                                                                                            | 19                             | In-depth interviews                                                                                   | Theoretical Domains Framework (TDF)                                                                                  | Thematic analysis                                                                                  |
| Dixon-Woods et al. (2013) [20] | United Kingdom | One large, acute care hospital     | ePrescribing + CDS | Front-line staff<br>Hospital senior executives                                                                                                                                                                                                                                                                                    | 10 + 190 hours of observations | Ethnographic observations<br>Informal conversations<br>Semistructured interviews<br>Document analysis |                                                                                                                      | Constant comparative method                                                                        |
| Dykstra (2002) [101]           | United States  | Four hospitals                     | CPOE               | Physicians<br>Administrators<br>IT staff<br>Pharmacists<br>Nurses                                                                                                                                                                                                                                                                 | 87                             | Observation<br>Formal oral history interviews<br>Focus groups<br>Informal interviews                  |                                                                                                                      | Grounded theory                                                                                    |
| Garfield et al. (2016) [100]   | United Kingdom | Two large teaching hospitals       | ePrescribing       | Adult inpatients<br>Carers<br>Healthcare professionals                                                                                                                                                                                                                                                                            | 590                            | Non-participant observations<br>Semi structured interviews                                            |                                                                                                                      | Thematic analysis                                                                                  |
| Griffon et al. (2017) [60]     | France         | One university hospital            | COPE + CDS         | Doctors (residents)                                                                                                                                                                                                                                                                                                               | 71                             | Questionnaire, including a qualitative component (free-text data)                                     |                                                                                                                      | Thematic analysis                                                                                  |

| Paper                      | Country       | Setting                                     | System type | Participants/user groups                                                                                                                                                             | Number of participants        | Data collection method                                      | Theoretical framework                                                    | Data analysis method          |
|----------------------------|---------------|---------------------------------------------|-------------|--------------------------------------------------------------------------------------------------------------------------------------------------------------------------------------|-------------------------------|-------------------------------------------------------------|--------------------------------------------------------------------------|-------------------------------|
| Hardie et al. (2017) [56]  | Australia     | Eight wards in an urban children's hospital | COPE + CDS  | Doctors<br>Nurses                                                                                                                                                                    | 90                            | Semi-structured interviews                                  |                                                                          | Thematic analysis             |
| Hawkins et al. (2017) [71] | United States | One midsized hospital                       | CPOE        | Administrative level staff (in nursing, quality, education, and pharmacy)<br>Medical staff<br>Pharmacists<br>Registered nurses                                                       | 37                            | Unstructured interviews<br>Observations<br>Document reviews |                                                                          | Conventional content analysis |
| Holden (2010) [82]         | United States | Two large tertiary hospitals                | EHR + CPOE  | Physicians                                                                                                                                                                           | 20                            | Semi-structured interviews                                  | Theory of Planned Behavior                                               | Thematic analysis             |
| Holden (2011) [69]         | United States | Two large tertiary hospitals                | EHR + CPOE  | Physicians                                                                                                                                                                           | 20                            | Semi-structured interviews                                  | Human factors paradigm for patient safety and Theory of Planned Behavior | Thematic analysis             |
| Jeon et al. (2014) [49]    | Canada        | One urban general hospital                  | CPOE        | Medical oncologists<br>Oncology pharmacists<br>Oncology nurses<br>Informaticians<br>Human factors engineers<br>Patient safety researchers<br>Policymakers<br>Hospital administrators | 30 (in qualitative component) | Workshop discussions                                        |                                                                          | Thematic analysis             |
| Johnson et al. (2006) [96] | United States | Two hospitals                               | CPOE        | Internal medicine physicians                                                                                                                                                         | 10                            | Think-aloud observations<br>Semi-structured questionnaire   |                                                                          | Thematic analysis             |

| Paper                        | Country                                                                                                           | Setting                                                     | System type                  | Participants/user groups                                                                                                               | Number of participants       | Data collection method                                                           | Theoretical framework         | Data analysis method                                             |
|------------------------------|-------------------------------------------------------------------------------------------------------------------|-------------------------------------------------------------|------------------------------|----------------------------------------------------------------------------------------------------------------------------------------|------------------------------|----------------------------------------------------------------------------------|-------------------------------|------------------------------------------------------------------|
| Jung et al. (2013) [79]      | Netherlands<br>Argentina<br>Denmark<br>France<br>Austria<br>Ireland<br>Italy<br>Bulgaria<br>Greece<br>Switzerland | Thirteen hospitals                                          | CPOE + varying levels of CDS | Physicians                                                                                                                             | 1,018                        | Cross-sectional quantitative and qualitative questionnaire                       |                               | Qualitative content analysis with inductive category development |
| Malato & Kim (2004) [41]     | United States                                                                                                     | Two acute care nursing units at a large acute care hospital | CPOE                         | Nurses                                                                                                                                 | 12 + 5 hours of observations | Open-ended interviews<br>Ethnographic observations                               |                               | Domain analysis                                                  |
| McMullen et al. (2015) [70]  | United States                                                                                                     | Three hospitals                                             | CPOE                         | Pharmacists                                                                                                                            | 96                           | Ethnographic observations<br>Focus groups<br>Interviews                          |                               | Thematic analysis                                                |
| Mills et al. (2017) [65]     | United Kingdom                                                                                                    | One district general hospital                               | ePrescribing + CDS           | Consultant doctors<br>Junior doctors<br>Pharmacists<br>Advanced nurse practitioners                                                    | 19                           | Semi-structured interviews                                                       | Theoretical Domains Framework | Framework analysis                                               |
| Mozaffar et al. (2016a) [21] | United Kingdom                                                                                                    | Six urban acute care hospitals                              | CPOE + CDS                   | Implementation team members<br>Systems users - clinical staff<br>Policymakers<br>Representatives of suppliers<br>Academics<br>Patients | 189                          | Semi-structured interviews<br>Expert roundtable discussions<br>Document analysis | Biography of Artefacts        | Thematic analysis                                                |

| Paper                         | Country        | Setting                                                 | System type        | Participants/user groups                                                                                                                                                                                                                   | Number of participants         | Data collection method                                          | Theoretical framework                                                                         | Data analysis method |
|-------------------------------|----------------|---------------------------------------------------------|--------------------|--------------------------------------------------------------------------------------------------------------------------------------------------------------------------------------------------------------------------------------------|--------------------------------|-----------------------------------------------------------------|-----------------------------------------------------------------------------------------------|----------------------|
| Mozaffar et al. (2016b) [64]  | United Kingdom | Vendors and adopters from multiple hospitals in England | CPOE + CDS         | Representatives from 4 vendors (project managers)<br>Representatives from 6 hospitals (project management team members, such as doctors and pharmacists)                                                                                   | 11 + 21 hours of observation   | Semi-structured interviews<br>Observation                       | Informed by studies of the evolution of technology fields                                     | Thematic analysis    |
| Mozaffar et al. (2017) [14]   | United Kingdom | Six urban acute care hospitals                          | ePrescribing + CDS | Clinical users (consultants, junior doctors, nurses, pharmacists and other health professionals)<br>Decision makers and managers (implementation teams, information technology specialists)<br>Technical support staff<br>System suppliers | 163 + 35 hours of observations | Semi-structured interviews<br>Observations<br>Document analysis | Biography of Artefacts                                                                        | Thematic analysis    |
| Niazkhani et al. (2008) [102] | Netherlands    | One academic urban hospital                             | CPOE               | Nurses<br>Physicians<br>Pharmacists<br>Pharmacy technicians                                                                                                                                                                                | 23                             | Semi-structured interviews<br>Document analysis                 | Self-developed conceptual framework for inter-professional workflow in the medication process | Thematic analysis    |
| Niazkhani et al. (2010a) [94] | Netherlands    | One academic urban hospital                             | CPOE               | Non-surgical: physicians, residents, head nurses and practicing nurses<br>Surgical: surgeons, surgery residents, head nurses and practicing nurses                                                                                         | 22                             | Semi-structured interviews<br>Observations                      |                                                                                               | Thematic analysis    |

| Paper                          | Country        | Setting                                                   | System type        | Participants/user groups                                                     | Number of participants           | Data collection method                                 | Theoretical framework                                                                         | Data analysis method             |
|--------------------------------|----------------|-----------------------------------------------------------|--------------------|------------------------------------------------------------------------------|----------------------------------|--------------------------------------------------------|-----------------------------------------------------------------------------------------------|----------------------------------|
| Niazkhani et al. (2010b) [103] | Netherlands    | One academic urban hospital                               | CPOE               | Nurses<br>Physicians<br>Pharmacists<br>Pharmacy technicians                  | 23                               | Semi-structured interviews<br>Document analysis        | Self-developed conceptual framework for inter-professional workflow in the medication process | Thematic analysis                |
| Niazkhani et al. (2011) [84]   | Netherlands    | One academic urban hospital                               | CPOE               | Nurses<br>Physicians<br>Pharmacists<br>Pharmacy technicians                  | 21                               | Semi-structured interviews<br>Document analysis        |                                                                                               | Thematic analysis                |
| Nies & Pelayo (2010) [87]      | France         | One large academic hospital                               | EHR + CPOE         | Physicians                                                                   | 10 + 20 observations             | Semi-structured interviews<br>Participant observations | Human Factors<br>Engineering approach                                                         | Human Factors' Activity Analysis |
| O'Grady et al. (2006) [72]     | United Kingdom | One general surgery ward                                  | ePrescribing       | Inpatients                                                                   | 20                               | Interviews                                             |                                                                                               | Thematic analysis                |
| Omar et al. (2017) [75]        | Sweden         | Pediatric department of university hospital               | ePrescribing + CDS | Pediatricians<br>Resident physicians<br>Pediatric surgeons<br>Neonatologists | Not reported                     | Semi-structured interviews                             | Extended Technology Acceptance Model (TAM2)                                                   | Not reported                     |
| Pelayo et al. (2010) [99]      | France         | Three hospitals                                           | CPOE               | Doctors<br>Nurses                                                            | 44 + 55 observations (3-8 hours) | Naturalistic observations<br>Interviews                |                                                                                               | Not reported                     |
| Pirnejad et al. (2008) [104]   | Netherlands    | Six internal medicine wards at an urban academic hospital | CPOE + CDS         | Nurses<br>Physicians                                                         | 15 (in qualitative component)    | Semi-structured interviews                             | Theoretical framework drawing on the concepts of articulation and interoperability            | Thematic analysis                |

| Paper                          | Country        | Setting                                                                   | System type        | Participants/user groups                   | Number of participants        | Data collection method                               | Theoretical framework                                                                                    | Data analysis method        |
|--------------------------------|----------------|---------------------------------------------------------------------------|--------------------|--------------------------------------------|-------------------------------|------------------------------------------------------|----------------------------------------------------------------------------------------------------------|-----------------------------|
|                                |                |                                                                           |                    |                                            |                               |                                                      | in collaborative work                                                                                    |                             |
| Pirnejad et al. (2009) [74]    | Netherlands    | Six internal medicine wards at an urban academic hospital                 | CPOE + CDS         | Nurses<br>Physicians                       | 15 (in qualitative component) | Semi-structured interviews                           | Theoretical framework drawing on the concepts of articulation and interoperability in collaborative work | Thematic analysis           |
| Pirnejad et al. (2011) [50]    | Netherlands    | Six internal medicine wards at an urban academic hospital                 | CPOE + CDS         | Physicians<br>Nurses<br>Project leaders    | 12                            | Semi-structured interviews                           |                                                                                                          | Thematic analysis           |
| Puaar and Franklin (2018) [63] | United Kingdom | One large teaching hospital                                               | ePrescribing + CDS | Doctors<br>Nurses                          | 25                            | Semi-structured interviews                           | Framework based on Reason's accident causation model                                                     | Thematic analysis           |
| Redwood et al. (2013) [77]     | United Kingdom | One large teaching hospital                                               | ePrescribing + CDS | Junior doctors                             | 19 (in qualitative component) | Focus groups<br>Semi-structured interviews           |                                                                                                          | Constant comparative method |
| Riccioli et al. (2011) [68]    | Italy          | One internal medicine ward                                                | ePrescribing       | Head physician<br>Head nurse<br>Physicians | 25                            | Semi-structured interviews<br>In-depth questionnaire |                                                                                                          | Not reported                |
| Santucci et al (2016) [76]     | Australia      | One general/neurological intensive care unit (ICU) at a teaching hospital | ePrescribing + CDS | Senior doctors<br>Junior doctors           | 20                            | Observations<br>Interviews                           |                                                                                                          | Thematic analysis           |

| Paper                           | Country        | Setting                                                                                                           | System type        | Participants/user groups                                                              | Number of participants               | Data collection method                                             | Theoretical framework                                        | Data analysis method |
|---------------------------------|----------------|-------------------------------------------------------------------------------------------------------------------|--------------------|---------------------------------------------------------------------------------------|--------------------------------------|--------------------------------------------------------------------|--------------------------------------------------------------|----------------------|
| Savage et al. (2010) [89]       | United Kingdom | One district general hospital                                                                                     | ePrescribing + CDS | Doctors<br>Nurses<br>Pharmacists<br>Pharmacy technicians<br>Adult in-patients         | 45 (in qualitative component)        | Interviews                                                         |                                                              | Thematic analysis    |
| Shemilt et al. (2017) [93]      | United Kingdom | 65 general acute hospitals in England                                                                             | ePrescribing       | Chief pharmacists (or their nominated representatives)                                | 65                                   | Semi-structured telephone interviews                               |                                                              | Grounded theory      |
| Simon et al. (2013) [19]        | United States  | Five community hospitals                                                                                          | CPOE + CDS         | Physicians<br>Nurses<br>Pharmacists                                                   | 24 + 8 hours of observation per site | Structured observations<br>In-depth, semi-structured interviews    |                                                              | Content analysis     |
| Sittig et al. (2005) [107]      | United States  | Five hospitals across four organisations, with differences in teaching status, geography and length of system use | CPOE               | Physicians<br>Administrators<br>Information technology staff<br>Pharmacists<br>Nurses | 74                                   | Participant observation<br>Oral history interviews<br>Focus groups | Storm and Storm's (1987) taxonomy of emotions                | Thematic analysis    |
| Tschannen et al. (2011) [67]    | United States  | Two inpatient units (adult medical and general pediatric) in a large tertiary-care hospital                       | CPOE               | Nurses                                                                                | 86                                   | Semi-structured interviews                                         | DeLone and McLean's (2003) Information Systems Success Model | Content analysis     |
| van der Sijs et al. (2008) [91] | Netherlands    | One urban general hospital                                                                                        | CPOE + CDS         | Physicians<br>Pharmacists                                                             | 24 (in qualitative component)        | Interviews                                                         |                                                              | Thematic analysis    |
| Wentzer et al. (2007) [86]      | Denmark        | Two internal medicine wards                                                                                       | CPOE               | Physicians<br>Nurses                                                                  | 6 + 48 hours of observation          | Observations<br>Semi-structured interviews<br>Document analysis    | Socio-technical approach                                     | Not reported         |
| Wong et al. (2012) [105]        | Canada         | Five urban teaching hospitals                                                                                     | CPOE + CDS         | Internal medicine residents<br>Attending physicians                                   | 17                                   | Semi-structured interviews                                         |                                                              | Grounded theory      |

| Paper                    | Country       | Setting                                                 | System type | Participants/user groups                                                                                         | Number of participants | Data collection method                                          | Theoretical framework                                                                                                                  | Data analysis method                                                |
|--------------------------|---------------|---------------------------------------------------------|-------------|------------------------------------------------------------------------------------------------------------------|------------------------|-----------------------------------------------------------------|----------------------------------------------------------------------------------------------------------------------------------------|---------------------------------------------------------------------|
| Yang et al. (2012) [66]  | Singapore     | One public hospital                                     | CPOE        | Adult physicians<br>Adult nurses<br>IT staff<br>Pediatric pharmacist<br>Pediatric physicians<br>Pediatric nurses | 30                     | Interviews<br>Document analysis                                 | A combination of 'accommodation to misfit' (Gasser, 1986) and 'information system evolution' (McGannand Lyytinen, 2008) perspectives   | Thematic analysis and process framework (Langley, 1999) development |
| Zhou et al. (2011) [108] | United States | One internal medicine unit at a large teaching hospital | CPOE        | Doctors<br>Residents on monthly rotation<br>Nurses                                                               | 103                    | Observations<br>Document analysis<br>Semi-structured interviews | Symbolic interactionism perspective, focusing on the use of the concepts of 'constant negotiation', 'boundary object' and 'assemblage' | Thematic analysis                                                   |
