# Supplementary material for: How do stakeholders experience the adoption of electronic prescribing systems in hospitals? A systematic review and thematic synthesis of qualitative studies
Source: PubMed Central journal article supplement (PMC6934241; doi:10.1136/bmjqs-2018-009082), 2019-07-29
Supplement: bmjqs-2018-009082supp005.pdf [file bmjqs-2018-009082supp005.pdf]

Supplementary Table 4. Quality assessment of included studies (n=79)

| Paper                       | Approach and design                                                            |                                                                               |                                               |                                                                             |                                                                             | Data collection                                      |                                                         |                                                                                          |                                                       | Data analysis and findings                                                     |                                              |                                             | Other                                      |
|-----------------------------|--------------------------------------------------------------------------------|-------------------------------------------------------------------------------|-----------------------------------------------|-----------------------------------------------------------------------------|-----------------------------------------------------------------------------|------------------------------------------------------|---------------------------------------------------------|------------------------------------------------------------------------------------------|-------------------------------------------------------|--------------------------------------------------------------------------------|----------------------------------------------|---------------------------------------------|--------------------------------------------|
|                             | 1. Was the research problem and/or research question clearly reported/defined? | 2. Was there a clear statement of the aims and/or objectives of the research? | 3. Was a qualitative methodology appropriate? | 4. Was the research design appropriate to address the aims of the research? | 5. Was the sampling and recruitment strategy clearly defined and justified? | 6. Was the method of data collection well described? | 7. Were any techniques to enhance trustworthiness used? | 8. Has the relationship between researchers and participants been adequately considered? | 9. Have ethical issues been taken into consideration? | 10. Was the data analysis/interpretation process well described and justified? | 11. Was there a clear statement of findings? | 12. Are the analysis and findings credible? | 13. Was any conflict of interest reported? |
|                             | Yes<br>Partially<br>No<br>Unclear                                              | Yes<br>Partially<br>No<br>Unclear                                             | Yes<br>Partially<br>No<br>Unclear             | Yes<br>Partially<br>No<br>Unclear                                           | Yes<br>Partially<br>No<br>Unclear                                           | Yes<br>Partially<br>No<br>Unclear                    | Yes<br>Partially<br>No<br>Unclear                       | Yes<br>Partially<br>No<br>Unclear                                                        | Yes<br>Partially<br>No<br>Unclear                     | Yes<br>Partially<br>No<br>Unclear                                              | Yes<br>Partially<br>No<br>Unclear            | Yes<br>Partially<br>No<br>Unclear           | Yes<br>No                                  |
| Aarts et al. (2004) [55]    | ●                                                                              | ●                                                                             | ●                                             | ●                                                                           | ●                                                                           | ●                                                    | ●                                                       | ●                                                                                        | ●                                                     | ●                                                                              | ●                                            | ●                                           | ●                                          |
| Abraham et al. (2018) [95]  | ●                                                                              | ●                                                                             | ●                                             | ●                                                                           | ●                                                                           | ●                                                    | ●                                                       | ●                                                                                        | ●                                                     | ●                                                                              | ●                                            | ●                                           | ●                                          |
| Abramson et al. (2012) [18] | ●                                                                              | ●                                                                             | ●                                             | ●                                                                           | ●                                                                           | ●                                                    | ●                                                       | ●                                                                                        | ●                                                     | ●                                                                              | ●                                            | ●                                           | ●                                          |
| Abramson et al. (2016) [81] | ●                                                                              | ●                                                                             | ●                                             | ●                                                                           | ●                                                                           | ●                                                    | ●                                                       | ●                                                                                        | ●                                                     | ●                                                                              | ●                                            | ●                                           | ●                                          |
| Ash et al. (1999) [24]      | ●                                                                              | ●                                                                             | ●                                             | ●                                                                           | ●                                                                           | ●                                                    | ●                                                       | ●                                                                                        | ●                                                     | ●                                                                              | ●                                            | ●                                           | ●                                          |
| Ash et al. (2000) [48]      | ●                                                                              | ●                                                                             | ●                                             | ●                                                                           | ●                                                                           | ●                                                    | ●                                                       | ●                                                                                        | ●                                                     | ●                                                                              | ●                                            | ●                                           | ●                                          |
| Ash et al. (2001a) [51]     | ●                                                                              | ●                                                                             | ●                                             | ●                                                                           | ●                                                                           | ●                                                    | ●                                                       | ●                                                                                        | ●                                                     | ●                                                                              | ●                                            | ●                                           | ●                                          |
| Ash et al. (2001b) [57]     | ●                                                                              | ●                                                                             | ●                                             | ●                                                                           | ●                                                                           | ●                                                    | ●                                                       | ●                                                                                        | ●                                                     | ●                                                                              | ●                                            | ●                                           | ●                                          |
| Ash et al. (2003a) [43]     | ●                                                                              | ●                                                                             | ●                                             | ●                                                                           | ●                                                                           | ●                                                    | ●                                                       | ●                                                                                        | ●                                                     | ●                                                                              | ●                                            | ●                                           | ●                                          |

Supplementary Table 4. Quality assessment of included studies (n=79)

| Paper                      | Approach and design                                                            |                                                                               |                                               |                                                                             |                                                                             | Data collection                                      |                                                         |                                                                                          |                                                       | Data analysis and findings                                                     |                                              |                                             |                                            | Other |
|----------------------------|--------------------------------------------------------------------------------|-------------------------------------------------------------------------------|-----------------------------------------------|-----------------------------------------------------------------------------|-----------------------------------------------------------------------------|------------------------------------------------------|---------------------------------------------------------|------------------------------------------------------------------------------------------|-------------------------------------------------------|--------------------------------------------------------------------------------|----------------------------------------------|---------------------------------------------|--------------------------------------------|-------|
|                            | 1. Was the research problem and/or research question clearly reported/defined? | 2. Was there a clear statement of the aims and/or objectives of the research? | 3. Was a qualitative methodology appropriate? | 4. Was the research design appropriate to address the aims of the research? | 5. Was the sampling and recruitment strategy clearly defined and justified? | 6. Was the method of data collection well described? | 7. Were any techniques to enhance trustworthiness used? | 8. Has the relationship between researchers and participants been adequately considered? | 9. Have ethical issues been taken into consideration? | 10. Was the data analysis/interpretation process well described and justified? | 11. Was there a clear statement of findings? | 12. Are the analysis and findings credible? | 13. Was any conflict of interest reported? |       |
|                            | Yes<br>Partially<br>No<br>Unclear                                              | Yes<br>Partially<br>No<br>Unclear                                             | Yes<br>Partially<br>No<br>Unclear             | Yes<br>Partially<br>No<br>Unclear                                           | Yes<br>Partially<br>No<br>Unclear                                           | Yes<br>Partially<br>No<br>Unclear                    | Yes<br>Partially<br>No<br>Unclear                       | Yes<br>Partially<br>No<br>Unclear                                                        | Yes<br>Partially<br>No<br>Unclear                     | Yes<br>Partially<br>No<br>Unclear                                              | Yes<br>Partially<br>No<br>Unclear            | Yes<br>Partially<br>No<br>Unclear           | Yes<br>No                                  |       |
| Ash et al. (2003b) [42]    | •                                                                              | •                                                                             | •                                             | •                                                                           | •                                                                           | •                                                    | •                                                       | •                                                                                        | •                                                     | •                                                                              | •                                            | •                                           | •                                          |       |
| Ash et al. (2003c) [58]    | •                                                                              | •                                                                             | •                                             | •                                                                           | •                                                                           | •                                                    | •                                                       | •                                                                                        | •                                                     | •                                                                              | •                                            | •                                           | •                                          |       |
| Ash et al. (2005) [52]     | •                                                                              | •                                                                             | •                                             | •                                                                           | •                                                                           | •                                                    | •                                                       | •                                                                                        | •                                                     | •                                                                              | •                                            | •                                           | •                                          |       |
| Ash et al. (2012) [53]     | •                                                                              | •                                                                             | •                                             | •                                                                           | •                                                                           | •                                                    | •                                                       | •                                                                                        | •                                                     | •                                                                              | •                                            | •                                           | •                                          |       |
| Barber et al. (2007) [16]  | •                                                                              | •                                                                             | •                                             | •                                                                           | •                                                                           | •                                                    | •                                                       | •                                                                                        | •                                                     | •                                                                              | •                                            | •                                           | •                                          |       |
| Baysari et al. (2011) [80] | •                                                                              | •                                                                             | •                                             | •                                                                           | •                                                                           | •                                                    | •                                                       | •                                                                                        | •                                                     | •                                                                              | •                                            | •                                           | •                                          |       |
| Baysari et al. (2012) [73] | •                                                                              | •                                                                             | •                                             | •                                                                           | •                                                                           | •                                                    | •                                                       | •                                                                                        | •                                                     | •                                                                              | •                                            | •                                           | •                                          |       |
| Baysari et al. (2014) [78] | •                                                                              | •                                                                             | •                                             | •                                                                           | •                                                                           | •                                                    | •                                                       | •                                                                                        | •                                                     | •                                                                              | •                                            | •                                           | •                                          |       |
| Baysari et al. (2017) [92] | •                                                                              | •                                                                             | •                                             | •                                                                           | •                                                                           | •                                                    | •                                                       | •                                                                                        | •                                                     | •                                                                              | •                                            | •                                           | •                                          |       |
| Baysari et al. (2018) [61] | •                                                                              | •                                                                             | •                                             | •                                                                           | •                                                                           | •                                                    | •                                                       | •                                                                                        | •                                                     | •                                                                              | •                                            | •                                           | •                                          |       |
| Botta & Cutler             | •                                                                              | •                                                                             | •                                             | •                                                                           | •                                                                           | •                                                    | •                                                       | •                                                                                        | •                                                     | •                                                                              | •                                            | •                                           | •                                          |       |

Supplementary Table 4. Quality assessment of included studies (n=79)

| Paper                             | Approach and design                                                            |                                                                               |                                               |                                                                             |                                                                             | Data collection                                      |                                                         |                                                                                          |                                                       | Data analysis and findings                                                     |                                              |                                             |                                            | Other |
|-----------------------------------|--------------------------------------------------------------------------------|-------------------------------------------------------------------------------|-----------------------------------------------|-----------------------------------------------------------------------------|-----------------------------------------------------------------------------|------------------------------------------------------|---------------------------------------------------------|------------------------------------------------------------------------------------------|-------------------------------------------------------|--------------------------------------------------------------------------------|----------------------------------------------|---------------------------------------------|--------------------------------------------|-------|
|                                   | 1. Was the research problem and/or research question clearly reported/defined? | 2. Was there a clear statement of the aims and/or objectives of the research? | 3. Was a qualitative methodology appropriate? | 4. Was the research design appropriate to address the aims of the research? | 5. Was the sampling and recruitment strategy clearly defined and justified? | 6. Was the method of data collection well described? | 7. Were any techniques to enhance trustworthiness used? | 8. Has the relationship between researchers and participants been adequately considered? | 9. Have ethical issues been taken into consideration? | 10. Was the data analysis/interpretation process well described and justified? | 11. Was there a clear statement of findings? | 12. Are the analysis and findings credible? | 13. Was any conflict of interest reported? |       |
|                                   | Yes<br>Partially<br>No<br>Unclear                                              | Yes<br>Partially<br>No<br>Unclear                                             | Yes<br>Partially<br>No<br>Unclear             | Yes<br>Partially<br>No<br>Unclear                                           | Yes<br>Partially<br>No<br>Unclear                                           | Yes<br>Partially<br>No<br>Unclear                    | Yes<br>Partially<br>No<br>Unclear                       | Yes<br>Partially<br>No<br>Unclear                                                        | Yes<br>Partially<br>No<br>Unclear                     | Yes<br>Partially<br>No<br>Unclear                                              | Yes<br>Partially<br>No<br>Unclear            | Yes<br>Partially<br>No<br>Unclear           | Yes<br>No                                  |       |
| (2014)<br>[54]                    |                                                                                |                                                                               |                                               |                                                                             |                                                                             |                                                      |                                                         |                                                                                          |                                                       |                                                                                |                                              |                                             |                                            |       |
| Burgin et al. (2012)<br>[98]      | •                                                                              | •                                                                             | •                                             | •                                                                           | •                                                                           | •                                                    | •                                                       | •                                                                                        | •                                                     | •                                                                              | •                                            | •                                           | •                                          |       |
| Burgin et al. (2014)<br>[97]      | •                                                                              | •                                                                             | •                                             | •                                                                           | •                                                                           | •                                                    | •                                                       | •                                                                                        | •                                                     | •                                                                              | •                                            | •                                           | •                                          |       |
| Campbell et al. (2007)<br>[90]    | •                                                                              | •                                                                             | •                                             | •                                                                           | •                                                                           | •                                                    | •                                                       | •                                                                                        | •                                                     | •                                                                              | •                                            | •                                           | •                                          |       |
| Campbell et al. (2009)<br>[85]    | •                                                                              | •                                                                             | •                                             | •                                                                           | •                                                                           | •                                                    | •                                                       | •                                                                                        | •                                                     | •                                                                              | •                                            | •                                           | •                                          |       |
| Carpenter & Gorman (2001)<br>[83] | •                                                                              | •                                                                             | •                                             | •                                                                           | •                                                                           | •                                                    | •                                                       | •                                                                                        | •                                                     | •                                                                              | •                                            | •                                           | •                                          |       |
| Chow et al. (2015)<br>[106]       | •                                                                              | •                                                                             | •                                             | •                                                                           | •                                                                           | •                                                    | •                                                       | •                                                                                        | •                                                     | •                                                                              | •                                            | •                                           | •                                          |       |
| Cornford et al.                   | •                                                                              | •                                                                             | •                                             | •                                                                           | •                                                                           | •                                                    | •                                                       | •                                                                                        | •                                                     | •                                                                              | •                                            | •                                           | •                                          |       |

Supplementary Table 4. Quality assessment of included studies (n=79)

| Paper                          | Approach and design                                                            |                                                                               |                                               |                                                                             |                                                                             | Data collection                                      |                                                         |                                                                                          |                                                       | Data analysis and findings                                                     |                                              |                                             | Other                                      |
|--------------------------------|--------------------------------------------------------------------------------|-------------------------------------------------------------------------------|-----------------------------------------------|-----------------------------------------------------------------------------|-----------------------------------------------------------------------------|------------------------------------------------------|---------------------------------------------------------|------------------------------------------------------------------------------------------|-------------------------------------------------------|--------------------------------------------------------------------------------|----------------------------------------------|---------------------------------------------|--------------------------------------------|
|                                | 1. Was the research problem and/or research question clearly reported/defined? | 2. Was there a clear statement of the aims and/or objectives of the research? | 3. Was a qualitative methodology appropriate? | 4. Was the research design appropriate to address the aims of the research? | 5. Was the sampling and recruitment strategy clearly defined and justified? | 6. Was the method of data collection well described? | 7. Were any techniques to enhance trustworthiness used? | 8. Has the relationship between researchers and participants been adequately considered? | 9. Have ethical issues been taken into consideration? | 10. Was the data analysis/interpretation process well described and justified? | 11. Was there a clear statement of findings? | 12. Are the analysis and findings credible? | 13. Was any conflict of interest reported? |
|                                | Yes<br>Partially<br>No<br>Unclear                                              | Yes<br>Partially<br>No<br>Unclear                                             | Yes<br>Partially<br>No<br>Unclear             | Yes<br>Partially<br>No<br>Unclear                                           | Yes<br>Partially<br>No<br>Unclear                                           | Yes<br>Partially<br>No<br>Unclear                    | Yes<br>Partially<br>No<br>Unclear                       | Yes<br>Partially<br>No<br>Unclear                                                        | Yes<br>Partially<br>No<br>Unclear                     | Yes<br>Partially<br>No<br>Unclear                                              | Yes<br>Partially<br>No<br>Unclear            | Yes<br>Partially<br>No<br>Unclear           | Yes<br>No                                  |
| (2010)<br>[46]                 |                                                                                |                                                                               |                                               |                                                                             |                                                                             |                                                      |                                                         |                                                                                          |                                                       |                                                                                |                                              |                                             |                                            |
| Cresswell et al. (2013a) [44]  | •                                                                              | •                                                                             | •                                             | •                                                                           | •                                                                           | •                                                    | •                                                       | •                                                                                        | •                                                     | •                                                                              | •                                            | •                                           | •                                          |
| Cresswell et al. (2013b) [45]  | •                                                                              | •                                                                             | •                                             | •                                                                           | •                                                                           | •                                                    | •                                                       | •                                                                                        | •                                                     | •                                                                              | •                                            | •                                           | •                                          |
| Cresswell et al. (2014) [9]    | •                                                                              | •                                                                             | •                                             | •                                                                           | •                                                                           | •                                                    | •                                                       | •                                                                                        | •                                                     | •                                                                              | •                                            | •                                           | •                                          |
| Cresswell et al. (2016a) [109] | •                                                                              | •                                                                             | •                                             | •                                                                           | •                                                                           | •                                                    | •                                                       | •                                                                                        | •                                                     | •                                                                              | •                                            | •                                           | •                                          |
| Cresswell et al. (2016b) [62]  | •                                                                              | •                                                                             | •                                             | •                                                                           | •                                                                           | •                                                    | •                                                       | •                                                                                        | •                                                     | •                                                                              | •                                            | •                                           | •                                          |
| Cresswell et al. (2017a) [23]  | •                                                                              | •                                                                             | •                                             | •                                                                           | •                                                                           | •                                                    | •                                                       | •                                                                                        | •                                                     | •                                                                              | •                                            | •                                           | •                                          |
| Cresswell et al. (2017b) [22]  | •                                                                              | •                                                                             | •                                             | •                                                                           | •                                                                           | •                                                    | •                                                       | •                                                                                        | •                                                     | •                                                                              | •                                            | •                                           | •                                          |

Supplementary Table 4. Quality assessment of included studies (n=79)

| Paper                          | Approach and design                                                            |                                                                               |                                               |                                                                             |                                                                             | Data collection                                      |                                                         |                                                                                          |                                                       | Data analysis and findings                                                     |                                              |                                             |                                            | Other |  |
|--------------------------------|--------------------------------------------------------------------------------|-------------------------------------------------------------------------------|-----------------------------------------------|-----------------------------------------------------------------------------|-----------------------------------------------------------------------------|------------------------------------------------------|---------------------------------------------------------|------------------------------------------------------------------------------------------|-------------------------------------------------------|--------------------------------------------------------------------------------|----------------------------------------------|---------------------------------------------|--------------------------------------------|-------|--|
|                                | 1. Was the research problem and/or research question clearly reported/defined? | 2. Was there a clear statement of the aims and/or objectives of the research? | 3. Was a qualitative methodology appropriate? | 4. Was the research design appropriate to address the aims of the research? | 5. Was the sampling and recruitment strategy clearly defined and justified? | 6. Was the method of data collection well described? | 7. Were any techniques to enhance trustworthiness used? | 8. Has the relationship between researchers and participants been adequately considered? | 9. Have ethical issues been taken into consideration? | 10. Was the data analysis/interpretation process well described and justified? | 11. Was there a clear statement of findings? | 12. Are the analysis and findings credible? | 13. Was any conflict of interest reported? |       |  |
|                                | Yes<br>Partially<br>No<br>Unclear                                              | Yes<br>Partially<br>No<br>Unclear                                             | Yes<br>Partially<br>No<br>Unclear             | Yes<br>Partially<br>No<br>Unclear                                           | Yes<br>Partially<br>No<br>Unclear                                           | Yes<br>Partially<br>No<br>Unclear                    | Yes<br>Partially<br>No<br>Unclear                       | Yes<br>Partially<br>No<br>Unclear                                                        | Yes<br>Partially<br>No<br>Unclear                     | Yes<br>Partially<br>No<br>Unclear                                              | Yes<br>Partially<br>No<br>Unclear            | Yes<br>Partially<br>No<br>Unclear           | Yes<br>No                                  |       |  |
| Cresswell et al (2017c) [59]   | •                                                                              | •                                                                             | •                                             | •                                                                           | •                                                                           | •                                                    | •                                                       | •                                                                                        | •                                                     | •                                                                              | •                                            | •                                           | •                                          |       |  |
| Davidson & Chismar (2007) [47] | •                                                                              | •                                                                             | •                                             | •                                                                           | •                                                                           | •                                                    | •                                                       | •                                                                                        | •                                                     | •                                                                              | •                                            | •                                           | •                                          |       |  |
| Debono et al. (2017) [88]      | •                                                                              | •                                                                             | •                                             | •                                                                           | •                                                                           | •                                                    | •                                                       | •                                                                                        | •                                                     | •                                                                              | •                                            | •                                           | •                                          |       |  |
| Dixon-Woods et al. (2013) [20] | •                                                                              | •                                                                             | •                                             | •                                                                           | •                                                                           | •                                                    | •                                                       | •                                                                                        | •                                                     | •                                                                              | •                                            | •                                           | •                                          |       |  |
| Dykstra (2002) [101]           | •                                                                              | •                                                                             | •                                             | •                                                                           | •                                                                           | •                                                    | •                                                       | •                                                                                        | •                                                     | •                                                                              | •                                            | •                                           | •                                          |       |  |
| Garfield et al (2016) [100]    | •                                                                              | •                                                                             | •                                             | •                                                                           | •                                                                           | •                                                    | •                                                       | •                                                                                        | •                                                     | •                                                                              | •                                            | •                                           | •                                          |       |  |
| Griffon et al. (2017) [60]     | •                                                                              | •                                                                             | •                                             | •                                                                           | •                                                                           | •                                                    | •                                                       | •                                                                                        | •                                                     | •                                                                              | •                                            | •                                           | •                                          |       |  |
| Hardie et al. (2017) [56]      | •                                                                              | •                                                                             | •                                             | •                                                                           | •                                                                           | •                                                    | •                                                       | •                                                                                        | •                                                     | •                                                                              | •                                            | •                                           | •                                          |       |  |

Supplementary Table 4. Quality assessment of included studies (n=79)

| Paper                      | Approach and design                                                            |                                                                               |                                               |                                                                             |                                                                             | Data collection                                      |                                                         |                                                                                          |                                                       | Data analysis and findings                                                     |                                              |                                             |                                            | Other |
|----------------------------|--------------------------------------------------------------------------------|-------------------------------------------------------------------------------|-----------------------------------------------|-----------------------------------------------------------------------------|-----------------------------------------------------------------------------|------------------------------------------------------|---------------------------------------------------------|------------------------------------------------------------------------------------------|-------------------------------------------------------|--------------------------------------------------------------------------------|----------------------------------------------|---------------------------------------------|--------------------------------------------|-------|
|                            | 1. Was the research problem and/or research question clearly reported/defined? | 2. Was there a clear statement of the aims and/or objectives of the research? | 3. Was a qualitative methodology appropriate? | 4. Was the research design appropriate to address the aims of the research? | 5. Was the sampling and recruitment strategy clearly defined and justified? | 6. Was the method of data collection well described? | 7. Were any techniques to enhance trustworthiness used? | 8. Has the relationship between researchers and participants been adequately considered? | 9. Have ethical issues been taken into consideration? | 10. Was the data analysis/interpretation process well described and justified? | 11. Was there a clear statement of findings? | 12. Are the analysis and findings credible? | 13. Was any conflict of interest reported? |       |
|                            | Yes<br>Partially<br>No<br>Unclear                                              | Yes<br>Partially<br>No<br>Unclear                                             | Yes<br>Partially<br>No<br>Unclear             | Yes<br>Partially<br>No<br>Unclear                                           | Yes<br>Partially<br>No<br>Unclear                                           | Yes<br>Partially<br>No<br>Unclear                    | Yes<br>Partially<br>No<br>Unclear                       | Yes<br>Partially<br>No<br>Unclear                                                        | Yes<br>Partially<br>No<br>Unclear                     | Yes<br>Partially<br>No<br>Unclear                                              | Yes<br>Partially<br>No<br>Unclear            | Yes<br>Partially<br>No<br>Unclear           | Yes<br>No                                  |       |
| Hawkins et al. (2017) [71] | •                                                                              | •                                                                             | •                                             | •                                                                           | •                                                                           | •                                                    | •                                                       | •                                                                                        | •                                                     | •                                                                              | •                                            | •                                           | •                                          |       |
| Holden (2010) [82]         | •                                                                              | •                                                                             | •                                             | •                                                                           | •                                                                           | •                                                    | •                                                       | •                                                                                        | •                                                     | •                                                                              | •                                            | •                                           | •                                          |       |
| Holden (2011) [69]         | •                                                                              | •                                                                             | •                                             | •                                                                           | •                                                                           | •                                                    | •                                                       | •                                                                                        | •                                                     | •                                                                              | •                                            | •                                           | •                                          |       |
| Jeon et al. (2014) [49]    | •                                                                              | •                                                                             | •                                             | •                                                                           | •                                                                           | •                                                    | •                                                       | •                                                                                        | •                                                     | •                                                                              | •                                            | •                                           | •                                          |       |
| Johnson et al. (2006) [96] | •                                                                              | •                                                                             | •                                             | •                                                                           | •                                                                           | •                                                    | •                                                       | •                                                                                        | •                                                     | •                                                                              | •                                            | •                                           | •                                          |       |
| Jung et al. (2013) [79]    | •                                                                              | •                                                                             | •                                             | •                                                                           | •                                                                           | •                                                    | •                                                       | •                                                                                        | •                                                     | •                                                                              | •                                            | •                                           | •                                          |       |
| Malato & Kim (2004) [41]   | •                                                                              | •                                                                             | •                                             | •                                                                           | •                                                                           | •                                                    | •                                                       | •                                                                                        | •                                                     | •                                                                              | •                                            | •                                           | •                                          |       |

Supplementary Table 4. Quality assessment of included studies (n=79)

| Paper                          | Approach and design                                                            |                                                                               |                                               |                                                                             |                                                                             | Data collection                                      |                                                         |                                                                                          |                                                       | Data analysis and findings                                                     |                                              |                                             |                                            | Other |
|--------------------------------|--------------------------------------------------------------------------------|-------------------------------------------------------------------------------|-----------------------------------------------|-----------------------------------------------------------------------------|-----------------------------------------------------------------------------|------------------------------------------------------|---------------------------------------------------------|------------------------------------------------------------------------------------------|-------------------------------------------------------|--------------------------------------------------------------------------------|----------------------------------------------|---------------------------------------------|--------------------------------------------|-------|
|                                | 1. Was the research problem and/or research question clearly reported/defined? | 2. Was there a clear statement of the aims and/or objectives of the research? | 3. Was a qualitative methodology appropriate? | 4. Was the research design appropriate to address the aims of the research? | 5. Was the sampling and recruitment strategy clearly defined and justified? | 6. Was the method of data collection well described? | 7. Were any techniques to enhance trustworthiness used? | 8. Has the relationship between researchers and participants been adequately considered? | 9. Have ethical issues been taken into consideration? | 10. Was the data analysis/interpretation process well described and justified? | 11. Was there a clear statement of findings? | 12. Are the analysis and findings credible? | 13. Was any conflict of interest reported? |       |
|                                | Yes<br>Partially<br>No<br>Unclear                                              | Yes<br>Partially<br>No<br>Unclear                                             | Yes<br>Partially<br>No<br>Unclear             | Yes<br>Partially<br>No<br>Unclear                                           | Yes<br>Partially<br>No<br>Unclear                                           | Yes<br>Partially<br>No<br>Unclear                    | Yes<br>Partially<br>No<br>Unclear                       | Yes<br>Partially<br>No<br>Unclear                                                        | Yes<br>Partially<br>No<br>Unclear                     | Yes<br>Partially<br>No<br>Unclear                                              | Yes<br>Partially<br>No<br>Unclear            | Yes<br>Partially<br>No<br>Unclear           | Yes<br>No                                  |       |
| McMullen et al. (2015) [70]    | •                                                                              | •                                                                             | •                                             | •                                                                           | •                                                                           | •                                                    | •                                                       | •                                                                                        | •                                                     | •                                                                              | •                                            | •                                           | •                                          |       |
| Mills et al. (2017) [65]       | •                                                                              | •                                                                             | •                                             | •                                                                           | •                                                                           | •                                                    | •                                                       | •                                                                                        | •                                                     | •                                                                              | •                                            | •                                           | •                                          |       |
| Mozaffar et al. (2016a) [21]   | •                                                                              | •                                                                             | •                                             | •                                                                           | •                                                                           | •                                                    | •                                                       | •                                                                                        | •                                                     | •                                                                              | •                                            | •                                           | •                                          |       |
| Mozaffar et al. (2016b) [64]   | •                                                                              | •                                                                             | •                                             | •                                                                           | •                                                                           | •                                                    | •                                                       | •                                                                                        | •                                                     | •                                                                              | •                                            | •                                           | •                                          |       |
| Mozaffar et al. (2017) [14]    | •                                                                              | •                                                                             | •                                             | •                                                                           | •                                                                           | •                                                    | •                                                       | •                                                                                        | •                                                     | •                                                                              | •                                            | •                                           | •                                          |       |
| Niazkhani et al. (2008) [102]  | •                                                                              | •                                                                             | •                                             | •                                                                           | •                                                                           | •                                                    | •                                                       | •                                                                                        | •                                                     | •                                                                              | •                                            | •                                           | •                                          |       |
| Niazkhani et al. (2010a) [94]  | •                                                                              | •                                                                             | •                                             | •                                                                           | •                                                                           | •                                                    | •                                                       | •                                                                                        | •                                                     | •                                                                              | •                                            | •                                           | •                                          |       |
| Niazkhani et al. (2010b) [103] | •                                                                              | •                                                                             | •                                             | •                                                                           | •                                                                           | •                                                    | •                                                       | •                                                                                        | •                                                     | •                                                                              | •                                            | •                                           | •                                          |       |

Supplementary Table 4. Quality assessment of included studies (n=79)

| Paper                        | Approach and design                                                            |                                                                               |                                               |                                                                             |                                                                             | Data collection                                      |                                                         |                                                                                          |                                                       | Data analysis and findings                                                     |                                              |                                             |                                            | Other |  |
|------------------------------|--------------------------------------------------------------------------------|-------------------------------------------------------------------------------|-----------------------------------------------|-----------------------------------------------------------------------------|-----------------------------------------------------------------------------|------------------------------------------------------|---------------------------------------------------------|------------------------------------------------------------------------------------------|-------------------------------------------------------|--------------------------------------------------------------------------------|----------------------------------------------|---------------------------------------------|--------------------------------------------|-------|--|
|                              | 1. Was the research problem and/or research question clearly reported/defined? | 2. Was there a clear statement of the aims and/or objectives of the research? | 3. Was a qualitative methodology appropriate? | 4. Was the research design appropriate to address the aims of the research? | 5. Was the sampling and recruitment strategy clearly defined and justified? | 6. Was the method of data collection well described? | 7. Were any techniques to enhance trustworthiness used? | 8. Has the relationship between researchers and participants been adequately considered? | 9. Have ethical issues been taken into consideration? | 10. Was the data analysis/interpretation process well described and justified? | 11. Was there a clear statement of findings? | 12. Are the analysis and findings credible? | 13. Was any conflict of interest reported? |       |  |
|                              | Yes<br>Partially<br>No<br>Unclear                                              | Yes<br>Partially<br>No<br>Unclear                                             | Yes<br>Partially<br>No<br>Unclear             | Yes<br>Partially<br>No<br>Unclear                                           | Yes<br>Partially<br>No<br>Unclear                                           | Yes<br>Partially<br>No<br>Unclear                    | Yes<br>Partially<br>No<br>Unclear                       | Yes<br>Partially<br>No<br>Unclear                                                        | Yes<br>Partially<br>No<br>Unclear                     | Yes<br>Partially<br>No<br>Unclear                                              | Yes<br>Partially<br>No<br>Unclear            | Yes<br>Partially<br>No<br>Unclear           | Yes<br>No                                  |       |  |
| Niazkhani et al. (2011) [84] | •                                                                              | •                                                                             | •                                             | •                                                                           | •                                                                           | •                                                    | •                                                       | •                                                                                        | •                                                     | •                                                                              | •                                            | •                                           | •                                          |       |  |
| Nies & Pelayo (2010) [87]    | •                                                                              | •                                                                             | •                                             | •                                                                           | •                                                                           | •                                                    | •                                                       | •                                                                                        | •                                                     | •                                                                              | •                                            | •                                           | •                                          |       |  |
| O'Grady et al. (2006) [72]   | •                                                                              | •                                                                             | •                                             | •                                                                           | •                                                                           | •                                                    | •                                                       | •                                                                                        | •                                                     | •                                                                              | •                                            | •                                           | •                                          |       |  |
| Omar et al. (2017) [75]      | •                                                                              | •                                                                             | •                                             | •                                                                           | •                                                                           | •                                                    | •                                                       | •                                                                                        | •                                                     | •                                                                              | •                                            | •                                           | •                                          |       |  |
| Pelayo et al. (2010) [99]    | •                                                                              | •                                                                             | •                                             | •                                                                           | •                                                                           | •                                                    | •                                                       | •                                                                                        | •                                                     | •                                                                              | •                                            | •                                           | •                                          |       |  |
| Pirnejad et al. (2008) [104] | •                                                                              | •                                                                             | •                                             | •                                                                           | •                                                                           | •                                                    | •                                                       | •                                                                                        | •                                                     | •                                                                              | •                                            | •                                           | •                                          |       |  |
| Pirnejad et al. (2009) [74]  | •                                                                              | •                                                                             | •                                             | •                                                                           | •                                                                           | •                                                    | •                                                       | •                                                                                        | •                                                     | •                                                                              | •                                            | •                                           | •                                          |       |  |
| Pirnejad et al. (2011) [50]  | •                                                                              | •                                                                             | •                                             | •                                                                           | •                                                                           | •                                                    | •                                                       | •                                                                                        | •                                                     | •                                                                              | •                                            | •                                           | •                                          |       |  |



Supplementary Table 4. Quality assessment of included studies (n=79)

| Paper                         | Approach and design                                                            |                                                                               |                                               |                                                                             |                                                                             | Data collection                                      |                                                         |                                                                                          |                                                       | Data analysis and findings                                                     |                                              |                                             | Other                                      |
|-------------------------------|--------------------------------------------------------------------------------|-------------------------------------------------------------------------------|-----------------------------------------------|-----------------------------------------------------------------------------|-----------------------------------------------------------------------------|------------------------------------------------------|---------------------------------------------------------|------------------------------------------------------------------------------------------|-------------------------------------------------------|--------------------------------------------------------------------------------|----------------------------------------------|---------------------------------------------|--------------------------------------------|
|                               | 1. Was the research problem and/or research question clearly reported/defined? | 2. Was there a clear statement of the aims and/or objectives of the research? | 3. Was a qualitative methodology appropriate? | 4. Was the research design appropriate to address the aims of the research? | 5. Was the sampling and recruitment strategy clearly defined and justified? | 6. Was the method of data collection well described? | 7. Were any techniques to enhance trustworthiness used? | 8. Has the relationship between researchers and participants been adequately considered? | 9. Have ethical issues been taken into consideration? | 10. Was the data analysis/interpretation process well described and justified? | 11. Was there a clear statement of findings? | 12. Are the analysis and findings credible? | 13. Was any conflict of interest reported? |
|                               | Yes<br>Partially<br>No<br>Unclear                                              | Yes<br>Partially<br>No<br>Unclear                                             | Yes<br>Partially<br>No<br>Unclear             | Yes<br>Partially<br>No<br>Unclear                                           | Yes<br>Partially<br>No<br>Unclear                                           | Yes<br>Partially<br>No<br>Unclear                    | Yes<br>Partially<br>No<br>Unclear                       | Yes<br>Partially<br>No<br>Unclear                                                        | Yes<br>Partially<br>No<br>Unclear                     | Yes<br>Partially<br>No<br>Unclear                                              | Yes<br>Partially<br>No<br>Unclear            | Yes<br>Partially<br>No<br>Unclear           | Yes<br>No                                  |
| Puar and Franklin (2018) [63] | •                                                                              | •                                                                             | •                                             | •                                                                           | •                                                                           | •                                                    | •                                                       | •                                                                                        | •                                                     | •                                                                              | •                                            | •                                           | •                                          |
| Redwood et al. (2013) [77]    | •                                                                              | •                                                                             | •                                             | •                                                                           | •                                                                           | •                                                    | •                                                       | •                                                                                        | •                                                     | •                                                                              | •                                            | •                                           | •                                          |
| Riccioli et al. (2011) [68]   | •                                                                              | •                                                                             | •                                             | •                                                                           | •                                                                           | •                                                    | •                                                       | •                                                                                        | •                                                     | •                                                                              | •                                            | •                                           | •                                          |
| Santucci et al (2016) [76]    | •                                                                              | •                                                                             | •                                             | •                                                                           | •                                                                           | •                                                    | •                                                       | •                                                                                        | •                                                     | •                                                                              | •                                            | •                                           | •                                          |
| Savage et al. (2010) [89]     | •                                                                              | •                                                                             | •                                             | •                                                                           | •                                                                           | •                                                    | •                                                       | •                                                                                        | •                                                     | •                                                                              | •                                            | •                                           | •                                          |
| Shemilt et al. (2017) [93]    | •                                                                              | •                                                                             | •                                             | •                                                                           | •                                                                           | •                                                    | •                                                       | •                                                                                        | •                                                     | •                                                                              | •                                            | •                                           | •                                          |
| Simon et al. (2013) [19]      | •                                                                              | •                                                                             | •                                             | •                                                                           | •                                                                           | •                                                    | •                                                       | •                                                                                        | •                                                     | •                                                                              | •                                            | •                                           | •                                          |
| Sittig et al. (2005) [107]    | •                                                                              | •                                                                             | •                                             | •                                                                           | •                                                                           | •                                                    | •                                                       | •                                                                                        | •                                                     | •                                                                              | •                                            | •                                           | •                                          |
| Tschanne n et al              | •                                                                              | •                                                                             | •                                             | •                                                                           | •                                                                           | •                                                    | •                                                       | •                                                                                        | •                                                     | •                                                                              | •                                            | •                                           | •                                          |

Supplementary Table 4. Quality assessment of included studies (n=79)

| Paper                                     | Approach and design                                                            |                                                                               |                                               |                                                                             | Data collection                                                             |                                                      |                                                         |                                                                                          | Data analysis and findings                            |                                                                                |                                              |                                             | Other                                      |    |
|-------------------------------------------|--------------------------------------------------------------------------------|-------------------------------------------------------------------------------|-----------------------------------------------|-----------------------------------------------------------------------------|-----------------------------------------------------------------------------|------------------------------------------------------|---------------------------------------------------------|------------------------------------------------------------------------------------------|-------------------------------------------------------|--------------------------------------------------------------------------------|----------------------------------------------|---------------------------------------------|--------------------------------------------|----|
|                                           | 1. Was the research problem and/or research question clearly reported/defined? | 2. Was there a clear statement of the aims and/or objectives of the research? | 3. Was a qualitative methodology appropriate? | 4. Was the research design appropriate to address the aims of the research? | 5. Was the sampling and recruitment strategy clearly defined and justified? | 6. Was the method of data collection well described? | 7. Were any techniques to enhance trustworthiness used? | 8. Has the relationship between researchers and participants been adequately considered? | 9. Have ethical issues been taken into consideration? | 10. Was the data analysis/interpretation process well described and justified? | 11. Was there a clear statement of findings? | 12. Are the analysis and findings credible? | 13. Was any conflict of interest reported? |    |
|                                           | Yes<br>Partially<br>No<br>Unclear                                              | Yes<br>Partially<br>No<br>Unclear                                             | Yes<br>Partially<br>No<br>Unclear             | Yes<br>Partially<br>No<br>Unclear                                           | Yes<br>Partially<br>No<br>Unclear                                           | Yes<br>Partially<br>No<br>Unclear                    | Yes<br>Partially<br>No<br>Unclear                       | Yes<br>Partially<br>No<br>Unclear                                                        | Yes<br>Partially<br>No<br>Unclear                     | Yes<br>Partially<br>No<br>Unclear                                              | Yes<br>Partially<br>No<br>Unclear            | Yes<br>Partially<br>No<br>Unclear           | Yes<br>No                                  | No |
| (2011)<br>[67]                            |                                                                                |                                                                               |                                               |                                                                             |                                                                             |                                                      |                                                         |                                                                                          |                                                       |                                                                                |                                              |                                             |                                            |    |
| van der<br>Sijts et al.<br>(2008)<br>[91] | •                                                                              | •                                                                             | •                                             | •                                                                           | •                                                                           | •                                                    | •                                                       | •                                                                                        | •                                                     | •                                                                              | •                                            | •                                           | •                                          | •  |
| Wentzer<br>et al.<br>(2007)<br>[86]       | •                                                                              | •                                                                             | •                                             | •                                                                           | •                                                                           | •                                                    | •                                                       | •                                                                                        | •                                                     | •                                                                              | •                                            | •                                           | •                                          | •  |
| Wong et<br>al. (2012)<br>[105]            | •                                                                              | •                                                                             | •                                             | •                                                                           | •                                                                           | •                                                    | •                                                       | •                                                                                        | •                                                     | •                                                                              | •                                            | •                                           | •                                          | •  |
| Yang et<br>al. (2012)<br>[66]             | •                                                                              | •                                                                             | •                                             | •                                                                           | •                                                                           | •                                                    | •                                                       | •                                                                                        | •                                                     | •                                                                              | •                                            | •                                           | •                                          | •  |
| Zhou et<br>al. (2011)<br>[108]            | •                                                                              | •                                                                             | •                                             | •                                                                           | •                                                                           | •                                                    | •                                                       | •                                                                                        | •                                                     | •                                                                              | •                                            | •                                           | •                                          | •  |
|                                           | 35 16 28 0                                                                     | 69 7 3 0                                                                      | 63 16 0 0                                     | 66 8 2 3                                                                    | 44 24 9 2                                                                   | 57 18 4 0                                            | 38 12 15 14                                             | 10 16 51 2                                                                               | 24 39 6 10                                            | 43 22 14 0                                                                     | 69 10 0 0                                    | 55 22 1 1                                   | 4                                          | 75 |
